# Supplementary material for: Bacterial community structure correlates with Legionella pneumophila colonization of New York City high rise building premises plumbing systems
Source: Royal Society of Chemistry journal article supplement (doi:10.1039/c9ew01084j), 2020-01-01
Supplement: c9ew01084j1.pdf [file c9ew01084j1.pdf]

1 **Bacterial Community Structure Correlates with *Legionella***  
2 ***pneumophila* Colonization of New York City High Rise Building**  
3 **Premises Plumbing Systems**

4

5 **Supplementary Information**

6

7

8

9

10

11 Xiao Ma <sup>a</sup>, David Pierre <sup>a</sup>, Kyle Bibby <sup>b,c,1</sup>, Janet E. Stout <sup>a,b,\*</sup>

12

13

14

15

16

17

18

19

20 <sup>a</sup> Special Pathogens Laboratory, Pittsburgh, PA 15219, USA

21 <sup>b</sup> Department of Civil and Environmental Engineering, University of Pittsburgh, Pittsburgh, PA

22 15261, USA

23 <sup>c</sup> Department of Computational and Systems Biology, University of Pittsburgh Medical School,

24 Pittsburgh, PA 15261, USA

25

26

27

28 \*Corresponding Author: Janet E. Stout, 1401 Forbes Ave, Suite 401, Pittsburgh, PA 15219,

29 [jstout@specialpathogenslab.com](mailto:jstout@specialpathogenslab.com), 412-281-5335

30

31 <sup>1</sup> (Current affiliation) Department of Civil and Environmental Engineering and Earth Sciences,

32 University of Notre Dame, Notre Dame, IN 46556, USA

33

34

35

36

37

38

39

40

41 SI-Table 1. RDP taxonomy classification results of pure culture *Legionella* DNA

| Pure culture                  | Assigned taxa                            | Percentage assigned |
|-------------------------------|------------------------------------------|---------------------|
| <i>Legionella pneumophila</i> | <i>Legionella pneumophila</i>            | 99.80%              |
|                               | <i>Legionella</i> (unclassified species) | 0.02%               |
|                               | <i>Legionella cherrii</i>                | 0.02%               |
|                               | Not assigned as Legionellaceae           | 0.16%               |
| <i>Legionella micdadei</i>    | <i>Legionella micdadei</i>               | 99.90%              |
|                               | <i>Legionella cherrii</i>                | 0.02%               |
|                               | Not assigned as Legionellaceae           | 0.08%               |
| <i>Legionella anisa</i>       | <i>Legionella</i> (unclassified species) | 9.23%               |
|                               | <i>Legionella cherrii</i>                | 90.40%              |
|                               | <i>Legionella gratiana</i>               | 0.03%               |
|                               | <i>Legionella steelei</i>                | 0.08%               |
|                               | <i>Legionella steigerwaltii</i>          | 0.06%               |
|                               | Not assigned as Legionellaceae           | 0.21%               |

42

43

44 SI-Table 2. Number of samples positive or negative for *Legionella pneumophila*

|                           |          | <i>L. pneumophila</i> culture |          |
|---------------------------|----------|-------------------------------|----------|
|                           |          | Positive                      | Negative |
| <i>L. pneumophila</i> 16S | Positive | 16                            | 7        |
|                           | Negative | 4                             | 54       |

45

46

47

48

49

50

51

52

53

54

55

SI-Table 3. Least discriminant effect size (LEfSe) analysis to class level of bacterial community in cold water (CW) and hot water (HW)

| Bacterial taxa                                       | (log 10) Highest Mean Value | Temperature group | LDA Score (log 10) | P-Value  |
|------------------------------------------------------|-----------------------------|-------------------|--------------------|----------|
| k__Archaea.p__Euryarchaeota                          | 1.36                        | CW                | 3.98               | 0.019786 |
| k__Archaea.p__Euryarchaeota.c__Methanobacteria       | 1.36                        | CW                | 4.07               | 0.019786 |
| k__Bacteria.p__Thermi__                              | 4.09                        | HW                | 3.78               | 0.009107 |
| k__Bacteria.p__Thermi.c__Deinococci                  | 4.09                        | HW                | 3.78               | 0.009107 |
| k__Bacteria.p__Acidobacteria                         | 4.92                        | HW                | 4.48               | 1.97E-05 |
| k__Bacteria.p__Acidobacteria.c__Chloracidobacteria__ | 4.86                        | HW                | 4.48               | 8.13E-05 |
| k__Bacteria.p__Acidobacteria.c__Acidobacteriia       | 1.49                        | CW                | 3.10               | 0.004079 |
| k__Bacteria.p__Acidobacteria.c__Holophagae           | 4.19                        | CW                | 3.62               | 0.007257 |
| k__Bacteria.p__Acidobacteria.c__Solibacteres         | 4.00                        | HW                | 3.63               | 2.24E-05 |
| k__Bacteria.p__Armatimonadetes                       | 0.92                        | CW                | 3.46               | 0.019786 |
| k__Bacteria.p__Bacteroidetes                         | 5.14                        | HW                | 4.73               | 1.05E-05 |
| k__Bacteria.p__Bacteroidetes.c__                     | 4.68                        | HW                | 4.36               | 0.047202 |
| k__Bacteria.p__Bacteroidetes.c__Saprospirae__        | 4.90                        | HW                | 4.48               | 2.49E-05 |
| k__Bacteria.p__Chlorobi.c__OPB56                     | 3.29                        | HW                | 2.95               | 0.028952 |
| k__Bacteria.p__Chloroflexi                           | 3.01                        | HW                | 2.57               | 0.009265 |
| k__Bacteria.p__Chloroflexi.c__Ellin6529              | 2.98                        | HW                | 2.67               | 0.008015 |
| k__Bacteria.p__Firmicutes.c__Bacilli                 | 3.73                        | CW                | 3.27               | 0.012176 |
| k__Bacteria.p__Gemmatimonadetes                      | 4.47                        | HW                | 4.10               | 6.17E-05 |
| k__Bacteria.p__Gemmatimonadetes.c__Gemm_1            | 4.47                        | HW                | 4.11               | 2.42E-05 |
| k__Bacteria.p__Planctomycetes                        | 4.35                        | HW                | 3.86               | 0.047075 |
| k__Bacteria.p__Planctomycetes.c__Phycisphaerae       | 1.40                        | CW                | 3.17               | 0.019786 |
| k__Bacteria.p__Planctomycetes.c__Planctomycetia      | 4.35                        | HW                | 3.86               | 0.047075 |
| k__Bacteria.p__Proteobacteria                        | 5.96                        | CW                | 5.02               | 3.14E-06 |
| k__Bacteria.p__Proteobacteria.c__Alphaproteobacteria | 5.67                        | CW                | 4.99               | 0.010824 |
| k__Bacteria.p__Proteobacteria.c__Betaproteobacteria  | 5.59                        | HW                | 4.78               | 0.04708  |
| k__Bacteria.p__Proteobacteria.c__Gammaproteobacteria | 5.22                        | CW                | 4.87               | 1.88E-05 |
| k__Bacteria.p__SBR1093                               | 1.46                        | HW                | 2.28               | 0.030967 |
| k__Bacteria.p__SBR1093.c__                           | 1.44                        | HW                | 2.29               | 0.040964 |

57

58 SI-Table 4. ADONIS analysis of correlation between bacterial community variation and water quality parameters

| Parameters    | Unweighted UniFrac |       |                |       | Weighted UniFrac |       |                |       |
|---------------|--------------------|-------|----------------|-------|------------------|-------|----------------|-------|
|               | Hot water          |       | Cold water     |       | Hot water        |       | Cold water     |       |
|               | R <sup>2</sup>     | p     | R <sup>2</sup> | p     | R <sup>2</sup>   | p     | R <sup>2</sup> | p     |
| Temperature   | 0.029              | 0.01  | 0.061          | 0.038 | 0.03             | 0.174 | 0.092          | 0.04  |
| pH            | 0.028              | 0.017 | 0.067          | 0.01  | 0.015            | 0.54  | 0.045          | 0.42  |
| Free chlorine | 0.035              | 0.001 | 0.049          | 0.22  | 0.051            | 0.012 | 0.13           | 0.007 |
| Fe            | 0.031              | 0.015 | 0.04           | 0.61  | 0.044            | 0.026 | 0.02           | 0.87  |
| Ca            | 0.015              | 0.75  | 0.067          | 0.024 | 0.021            | 0.253 | 0.077          | 0.079 |
| Mg            | 0.017              | 0.54  | 0.072          | 0.011 | 0.0088           | 0.828 | 0.048          | 0.367 |
| Zn            | 0.02               | 0.31  | 0.054          | 0.12  | 0.011            | 0.721 | 0.03           | 0.65  |
| Pb            | 0.02               | 0.27  | 0.039          | 0.65  | 0.016            | 0.449 | 0.017          | 0.932 |
| Mn            | 0.035              | 0.003 | 0.037          | 0.75  | 0.042            | 0.031 | 0.035          | 0.58  |
| Cu            | 0.032              | 0.01  | 0.047          | 0.29  | 0.047            | 0.016 | 0.038          | 0.52  |
| TOC           | 0.12               | 0.003 | NA             | NA    | 0.069            | 0.461 | NA             | NA    |

59 NA: not applicable. TOC was only measured in hot water return line samples; ADONIS analysis of correlation between TOC and  
60 bacterial community variation were only conducted in hot water return line samples.

61

62

63

64

65

66

67

68

SI-Table 5. Least discriminant effect size (LEfSe) analysis to class level of cold water bacterial community in *L. pneumophila* positive and negative samples

| Bacterial taxa                                    | (log 10) Highest Mean Value | <i>L. pneumophila</i> positivity | LDA Score (log 10) | P-Value  |
|---------------------------------------------------|-----------------------------|----------------------------------|--------------------|----------|
| k_Bacteria.p_Thermi_                              | 4.04                        | P                                | 4.15               | 0.020409 |
| k_Bacteria.p_Thermi_.c_Deinococci                 | 4.04                        | P                                | 4.12               | 0.020409 |
| k_Bacteria.p_Acidobacteria.c_Chloracidobacteria_  | 4.81                        | P                                | 4.47               | 0.029547 |
| k_Bacteria.p_Acidobacteria.c_Solibacteres         | 3.91                        | P                                | 3.82               | 0.020279 |
| k_Bacteria.p_Bacteroidetes                        | 5.14                        | P                                | 4.81               | 0.03001  |
| k_Bacteria.p_Bacteroidetes.c_Saprospirae_         | 4.99                        | P                                | 4.67               | 0.022324 |
| k_Bacteria.p_Cyanobacteria                        | 4.24                        | P                                | 3.99               | 0.039807 |
| k_Bacteria.p_Cyanobacteria.c_4C0d_2               | 4.24                        | P                                | 3.99               | 0.039807 |
| k_Bacteria.p_Gemmatimonadetes                     | 4.53                        | P                                | 4.28               | 0.014655 |
| k_Bacteria.p_Gemmatimonadetes.c_Gemm_1            | 4.53                        | P                                | 4.27               | 0.008055 |
| k_Bacteria.p_Proteobacteria                       | 5.97                        | N                                | 5.08               | 0.039807 |
| k_Bacteria.p_Proteobacteria.c_Deltaproteobacteria | 4.56                        | P                                | 4.22               | 0.022211 |

69

SI-Table 6. Least discriminant effect size (LEfSe) analysis to class level of hot water bacterial community in *L. pneumophila* positive and negative samples

| Bacterial taxa                                   | (log 10) Highest Mean Value | <i>L. pneumophila</i> positivity | LDA Score (log 10) | P-Value  |
|--------------------------------------------------|-----------------------------|----------------------------------|--------------------|----------|
| k_Bacteria.p_Acidobacteria.c_Chloracidobacteria_ | 4.98                        | P                                | 4.25               | 0.031031 |
| k_Bacteria.p_Acidobacteria.c_Solibacteres        | 4.11                        | N                                | 3.71               | 0.032804 |
| k_Bacteria.p_Actinobacteria.c_Actinobacteria     | 3.97                        | P                                | 3.49               | 0.035093 |
| k_Bacteria.p_Bacteroidetes                       | 5.39                        | P                                | 4.85               | 0.035104 |
| k_Bacteria.p_Bacteroidetes.c_Saprospirae_        | 5.06                        | P                                | 4.45               | 0.021183 |
| k_Bacteria.p_Bacteroidetes.c_Bacteroidia         | 1.32                        | N                                | 3.80               | 0.033066 |
| k_Bacteria.p_Gemmatimonadetes                    | 4.52                        | P                                | 4.19               | 0.010471 |
| k_Bacteria.p_Gemmatimonadetes.c_Gemm_1           | 4.52                        | P                                | 4.19               | 0.010151 |
| k_Bacteria.p_Proteobacteria                      | 5.87                        | N                                | 4.90               | 0.017762 |
| k_Bacteria.p_SBR1093.c                           | 1.60                        | N                                | 3.98               | 0.023408 |

70

71

72 SI-Table 7. Spearman's rank-order correlation coefficient between relative abundance of bacteria classes associated with *L.*

|                       | Temperature       | pH              | Free Cl <sub>2</sub> | Fe                | Ca               | Mg               | Zn                | Pb | Mn                | Cu                | TOC               |
|-----------------------|-------------------|-----------------|----------------------|-------------------|------------------|------------------|-------------------|----|-------------------|-------------------|-------------------|
| <b>(Hot water)</b>    |                   |                 |                      |                   |                  |                  |                   |    |                   |                   |                   |
| Bacteroidia           | 0.357<br>(0.006)  |                 |                      |                   |                  | 0.361<br>(0.005) |                   |    |                   | -0.292<br>(0.025) |                   |
| Solibacteres          |                   |                 |                      |                   |                  |                  |                   |    | -0.439<br>(0.001) |                   | -0.612<br>(0.015) |
| Actinobacteria        | -0.309<br>(0.017) |                 |                      |                   |                  |                  |                   |    |                   |                   |                   |
| Gemm-1                |                   |                 |                      |                   |                  |                  | -0.264<br>(0.043) |    |                   |                   |                   |
| Chloracidobacteria    |                   |                 |                      |                   |                  |                  |                   |    |                   | 0.287<br>(0.028)  |                   |
| Saprospirae           | -0.333<br>(0.01)  |                 |                      | -0.274<br>(0.036) |                  |                  |                   |    |                   |                   |                   |
| <i>L. pneumophila</i> |                   | 0.32<br>(0.014) |                      |                   |                  |                  | -0.361<br>(0.014) |    |                   | -0.347<br>(0.007) |                   |
| <b>(Cold water)</b>   |                   |                 |                      |                   |                  |                  |                   |    |                   |                   |                   |
| 4C0d-2                |                   |                 |                      |                   | 0.524<br>(0.012) |                  |                   |    |                   |                   |                   |
| <i>L. pneumophila</i> |                   |                 |                      | -0.426<br>(0.048) |                  |                  |                   |    |                   |                   |                   |

73 *pneumophila* and water quality parameters; p-values are shown in ( )

74 Note: Coefficients with p-value > 0.05 are not shown

75

76

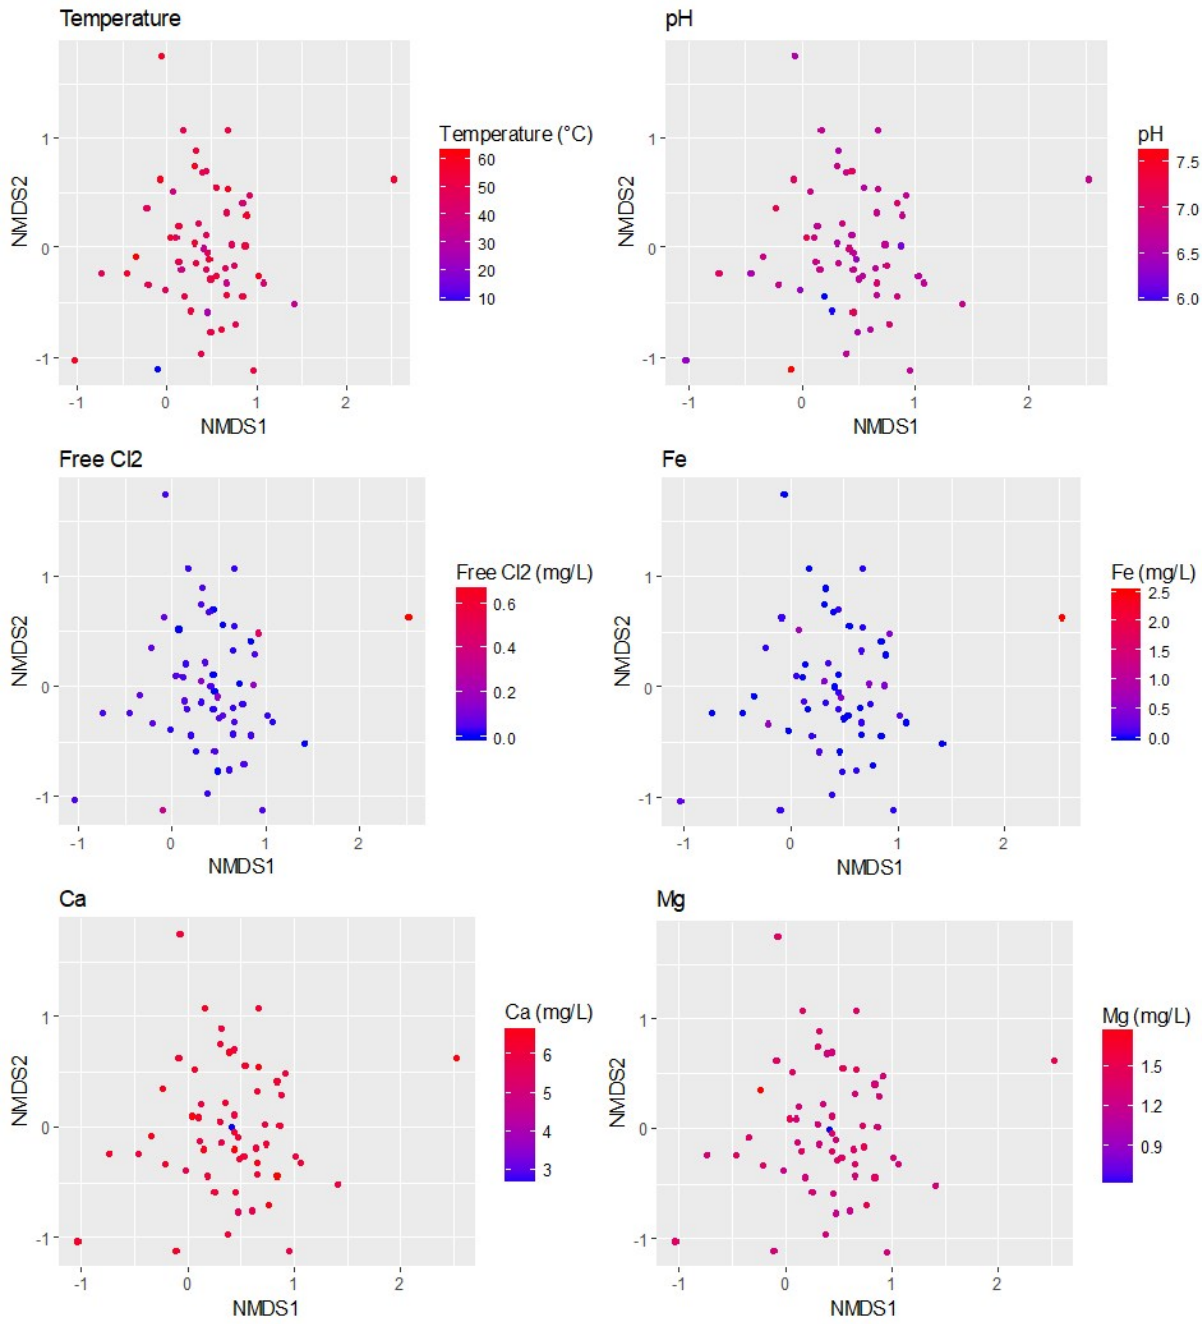

95

96

97

98 SI-Figure 1. Non-metric Multidimensional Scaling (NMDS) plot based on unweighted UniFrac  
99 distances showing hot water bacterial community in relation with water quality parameters

100

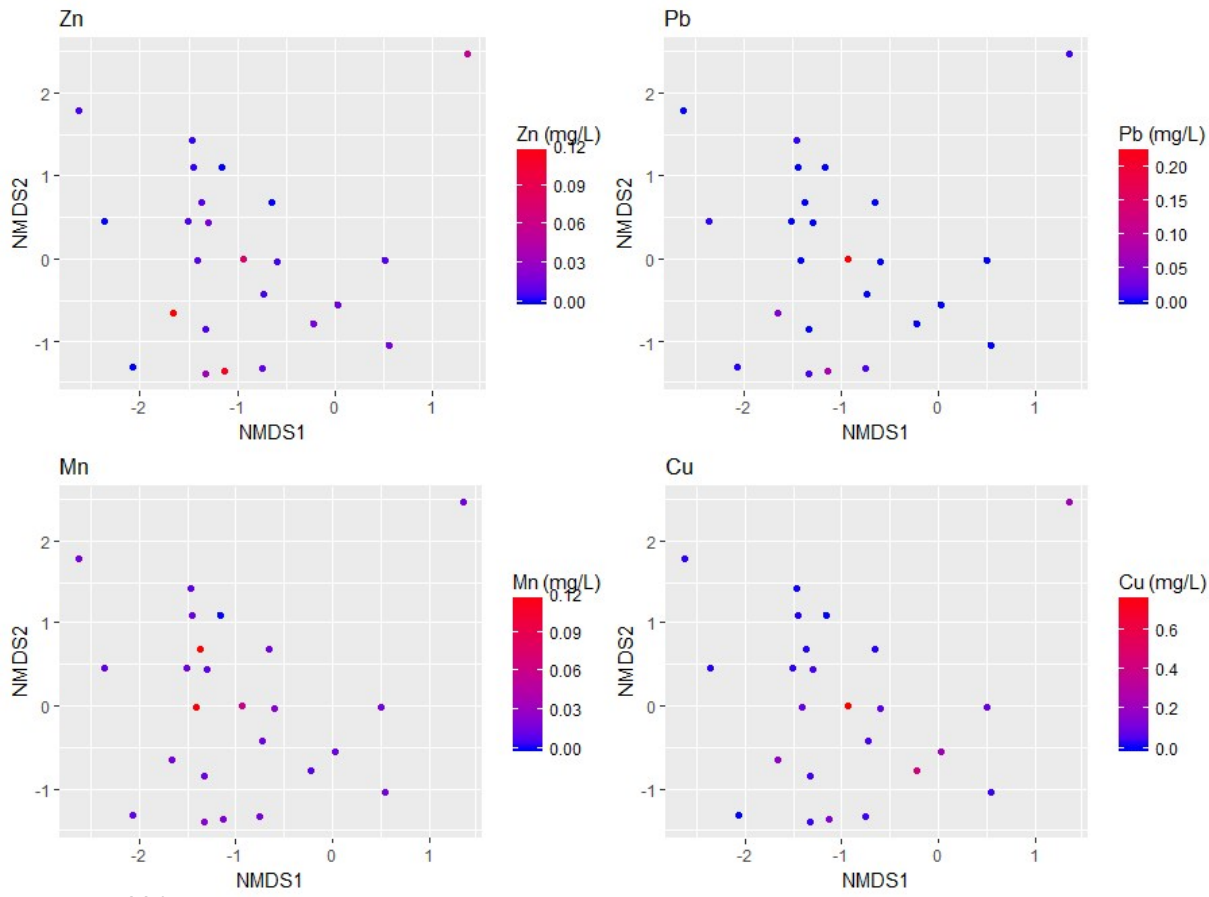

113

114

115

116

117 SI-Figure 1 (Continued). Non-metric Multidimensional Scaling (NMDS) plot based on  
118 unweighted UniFrac distances showing hot water bacterial community in relation with water  
119 quality parameters

120

121

122

123

124



125

126

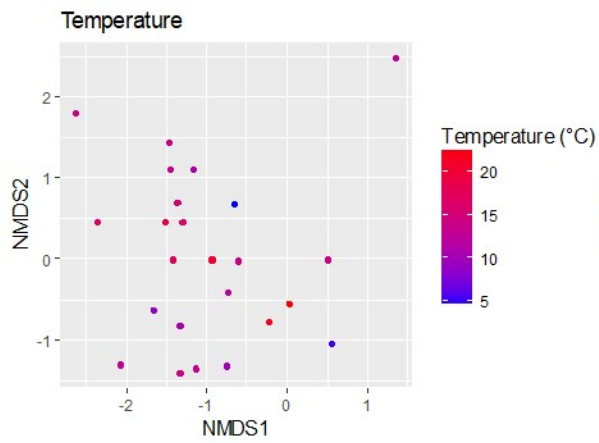

127

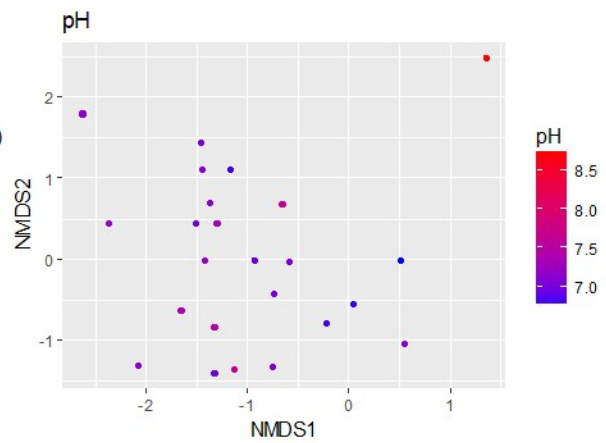

128

129

130

131

132

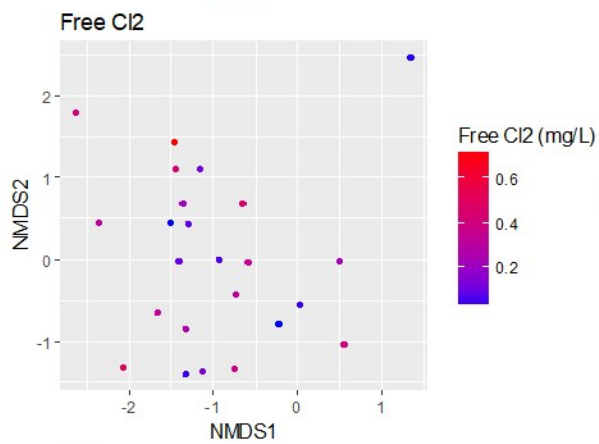

133

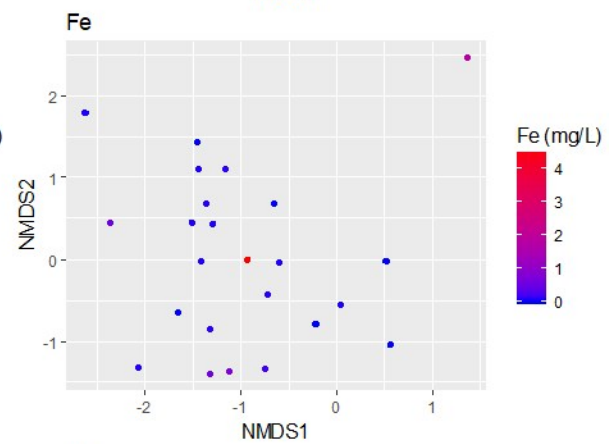

134

135

136

137

138

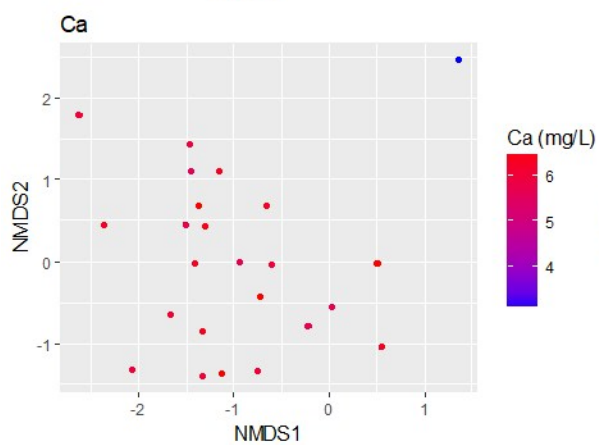

139

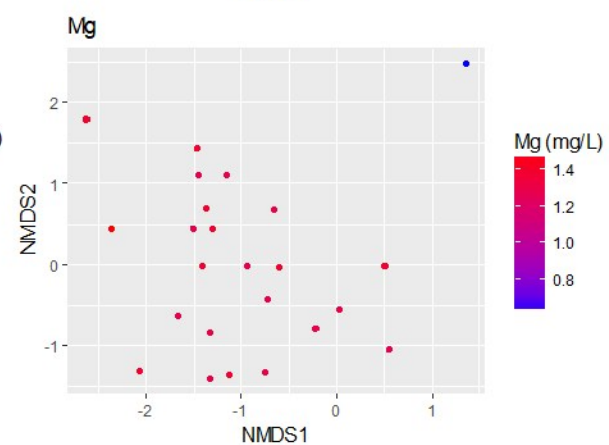

140

141

142

143

144

145

146

147 SI-Figure 2. Non-metric Multidimensional Scaling (NMDS) plot based on unweighted UniFrac  
148 distances showing cold water bacterial community in relation with water quality parameters

149

150

151

152

153

154

155

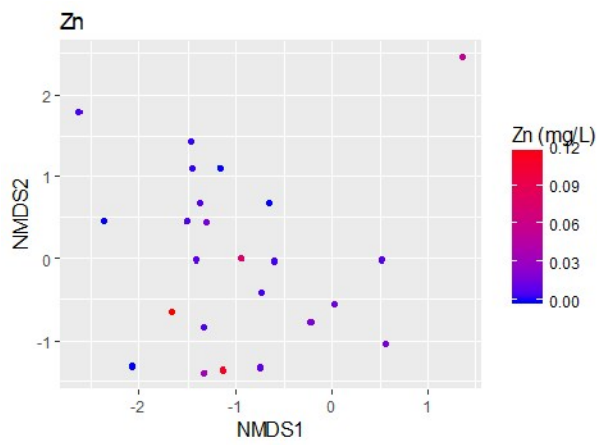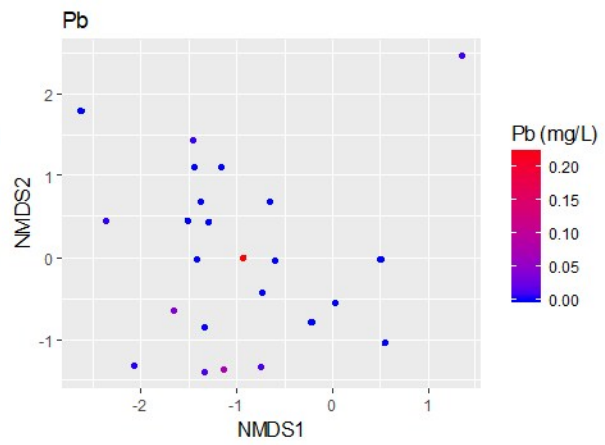

156

157

158

159

160

161

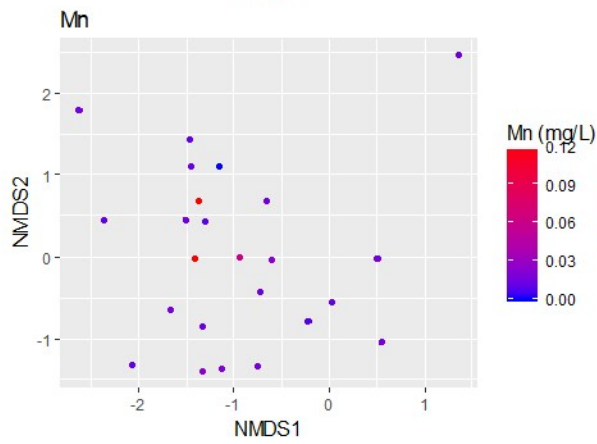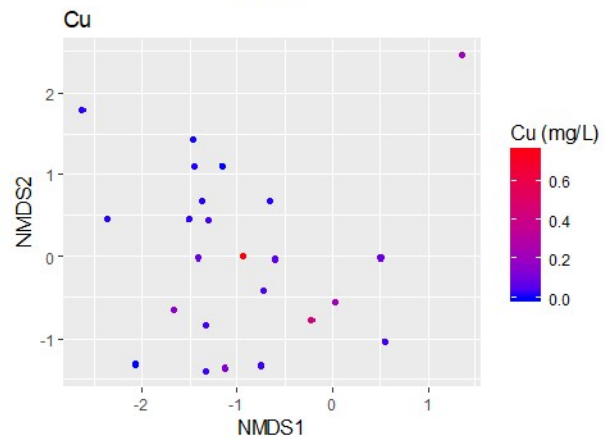

162

163

164

165 SI-Figure 2 (Continued). Non-metric Multidimensional Scaling (NMDS) plot based on  
166 unweighted UniFrac distances showing cold water bacterial community in relation with water  
167 quality parameters

168

169

170

171

172

173

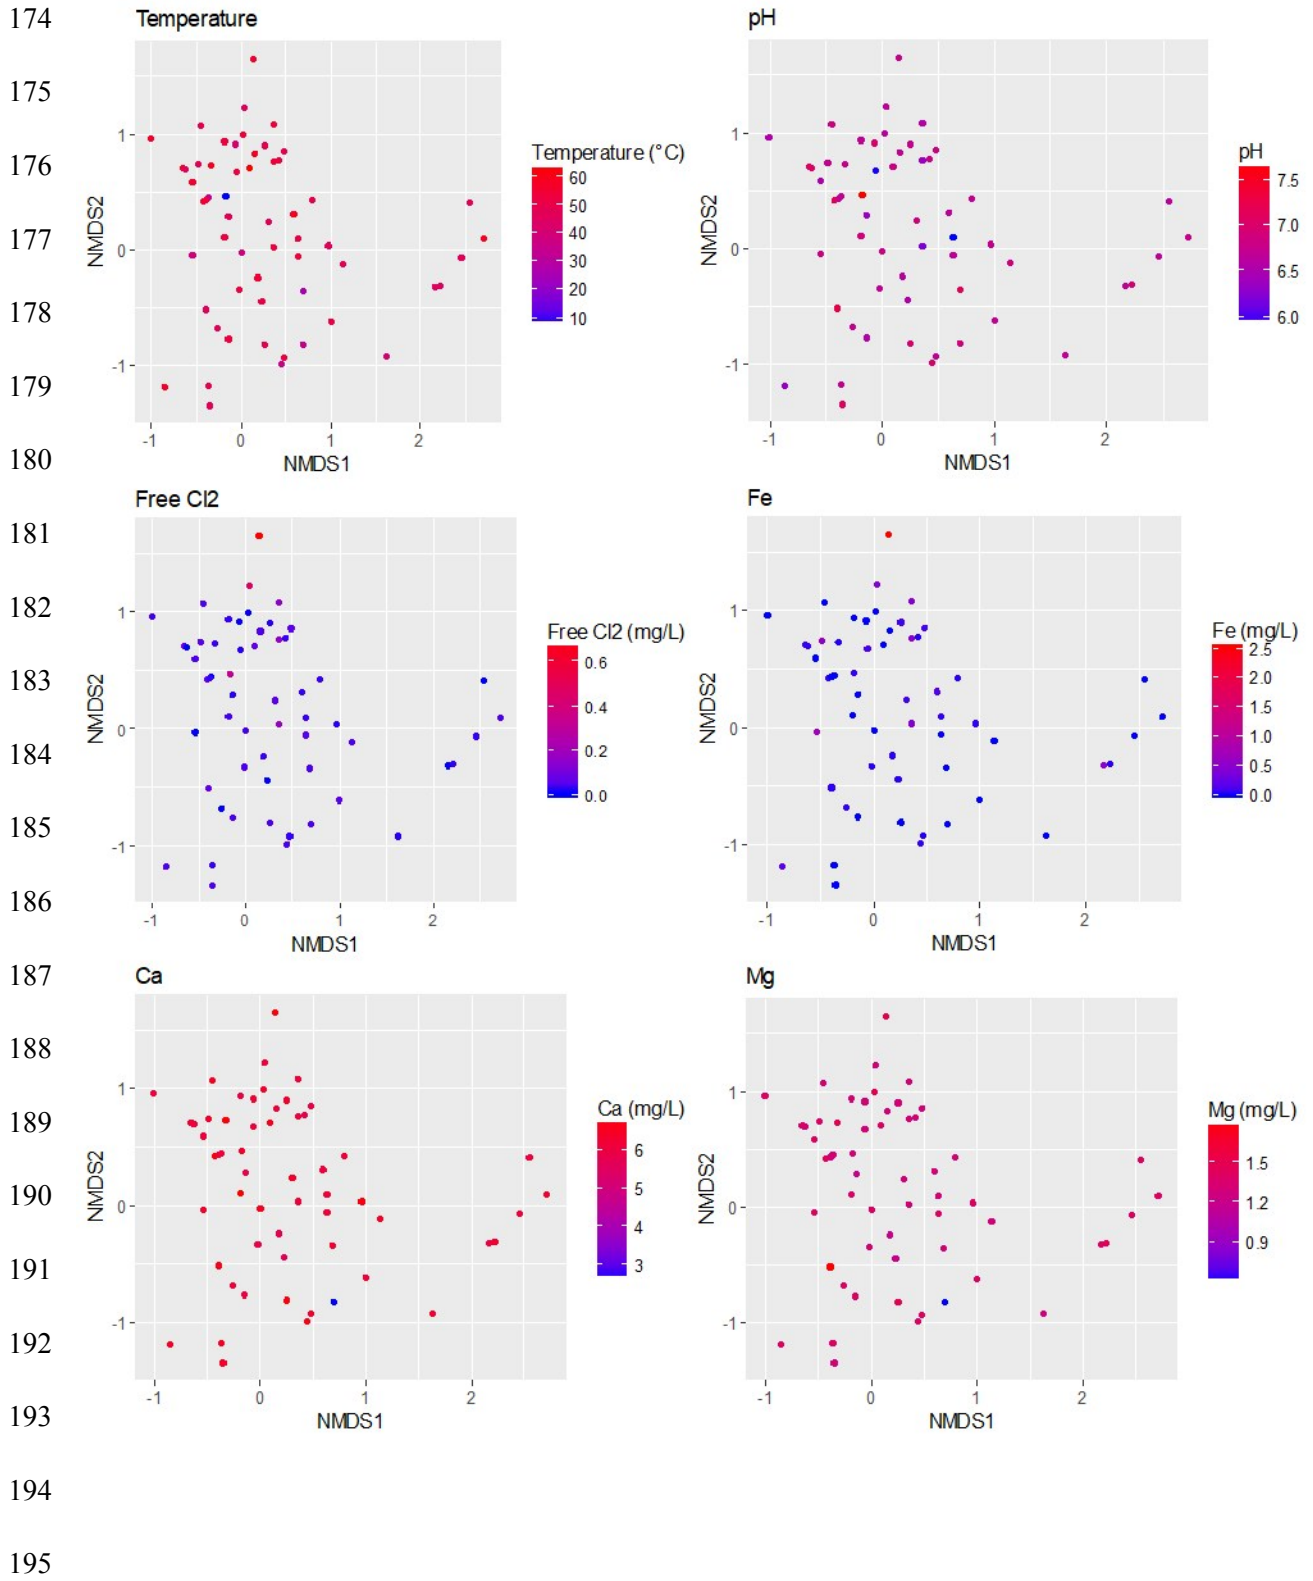

196 SI-Figure 3. Non-metric Multidimensional Scaling (NMDS) plot based on weighted UniFrac  
 197 distances showing hot water bacterial community in relation with water quality parameters

198  
199

200

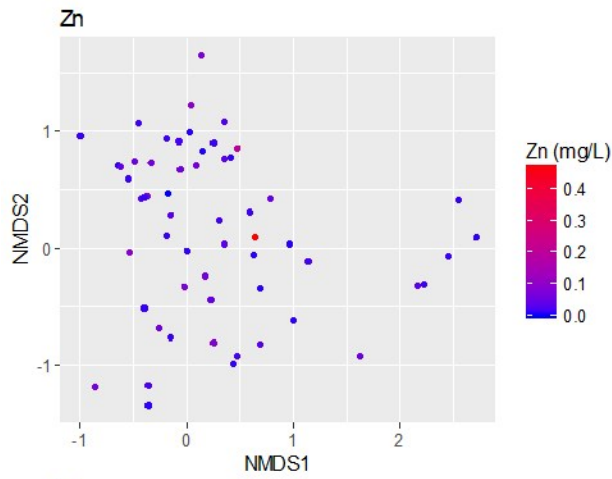

201

202

203

204

205

206

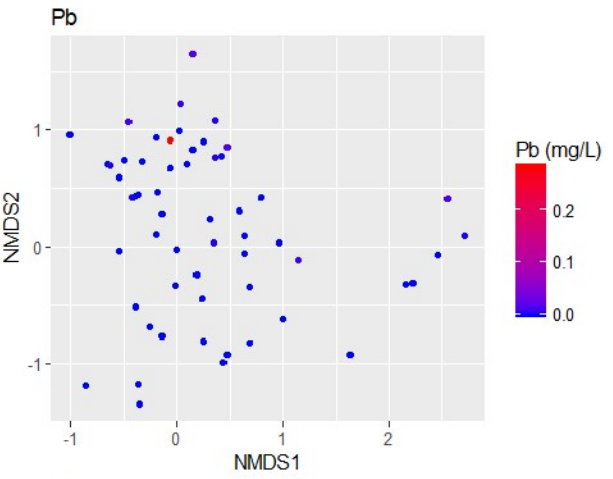

207

208

209

210

211

212

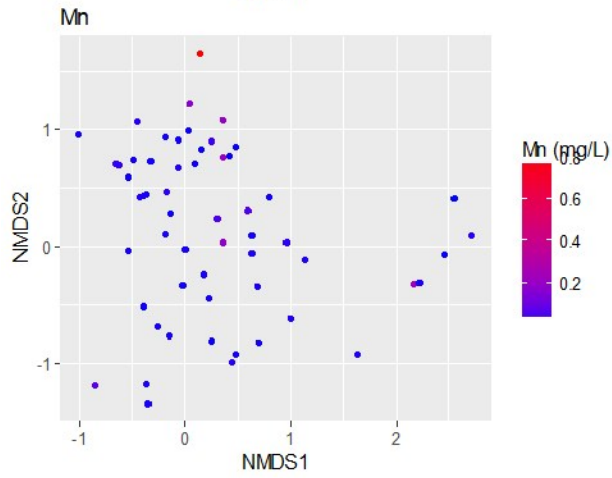

213

214

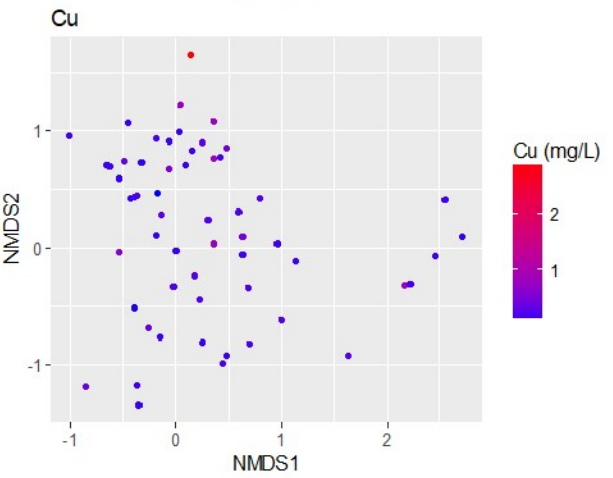

215 SI-Figure 3 (Continued). Non-metric Multidimensional Scaling (NMDS) plot based on weighted  
216 UniFrac distances showing hot water bacterial community in relation with water quality  
217 parameters

218

219

220

221

222

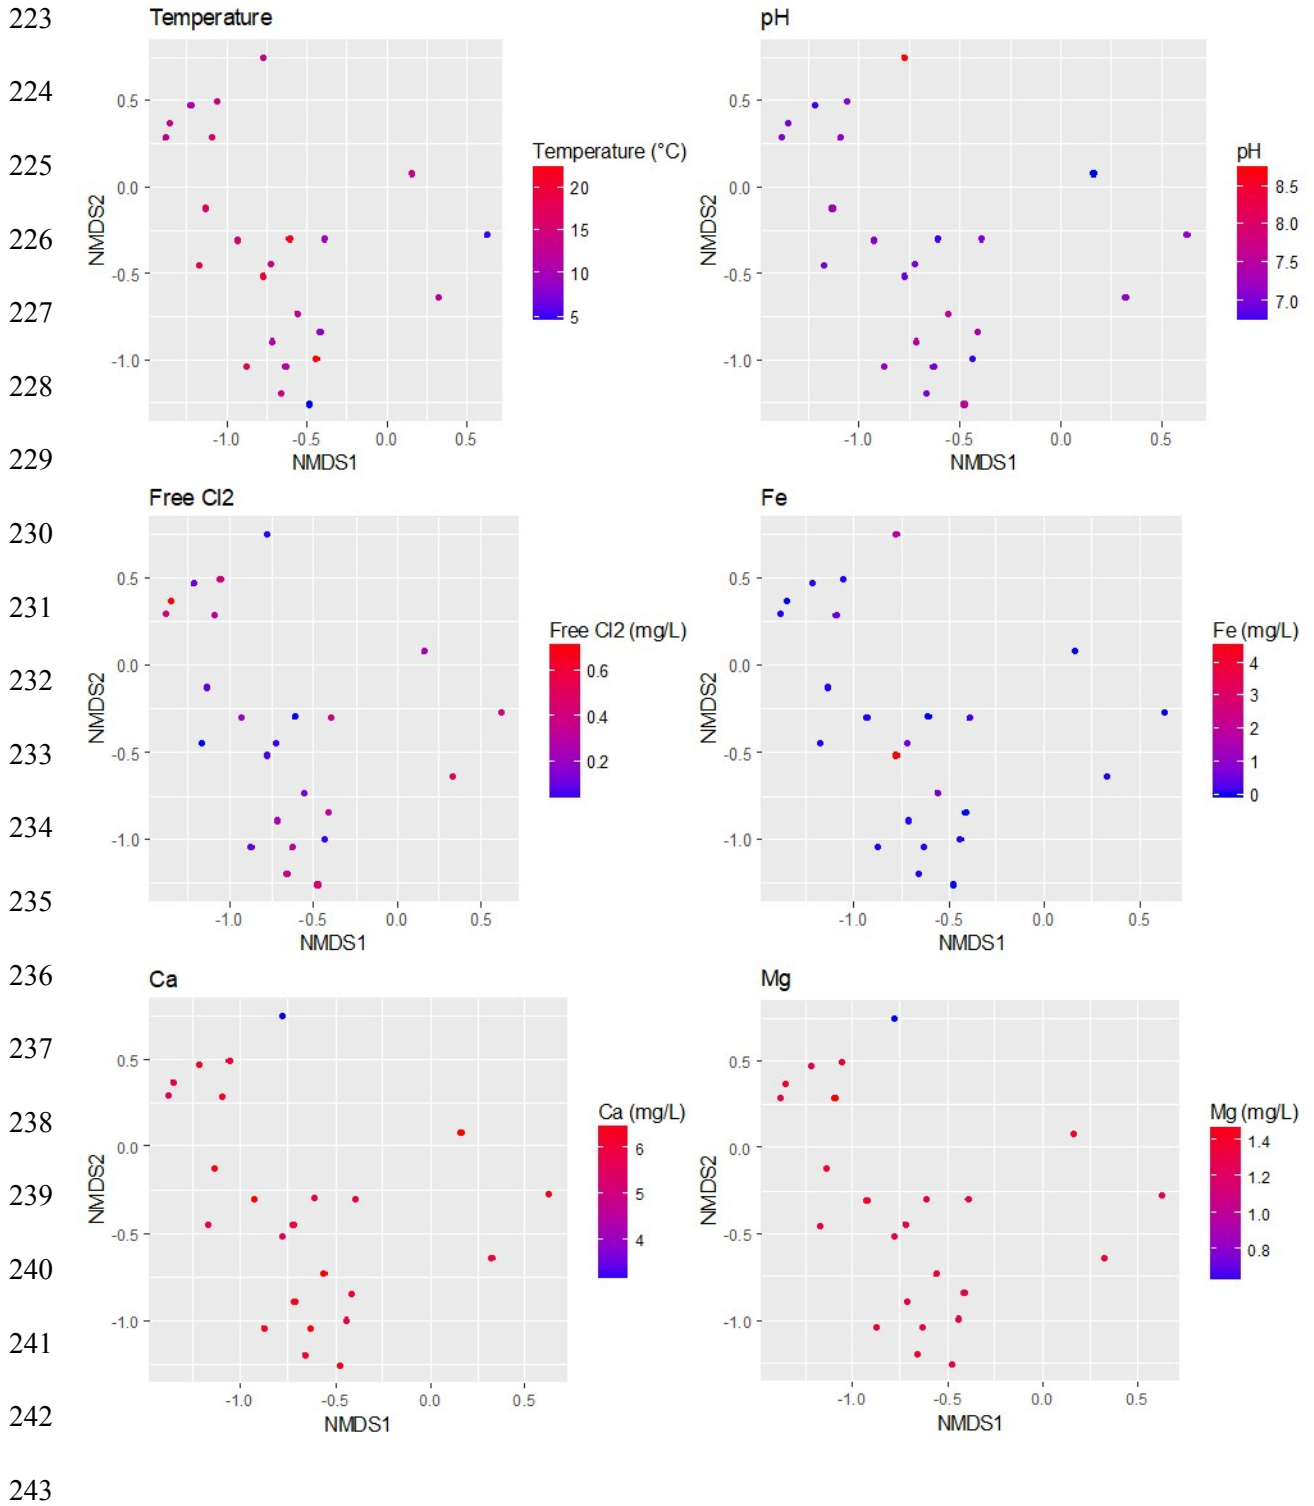

244 SI-Figure 4. Non-metric Multidimensional Scaling (NMDS) plot based on weighted UniFrac  
 245 distances showing cold water bacterial community in relation with water quality parameters  
 246

247

248

249

250

251

252

253

254

255

256

257

258

259

260

261

262

263 SI-Figure 4 (Continued). Non-metric Multidimensional Scaling (NMDS) plot based on weighted  
264 UniFrac distances showing cold water bacterial community in relation with water quality  
265 parameters  
266

267

268

269

270

271

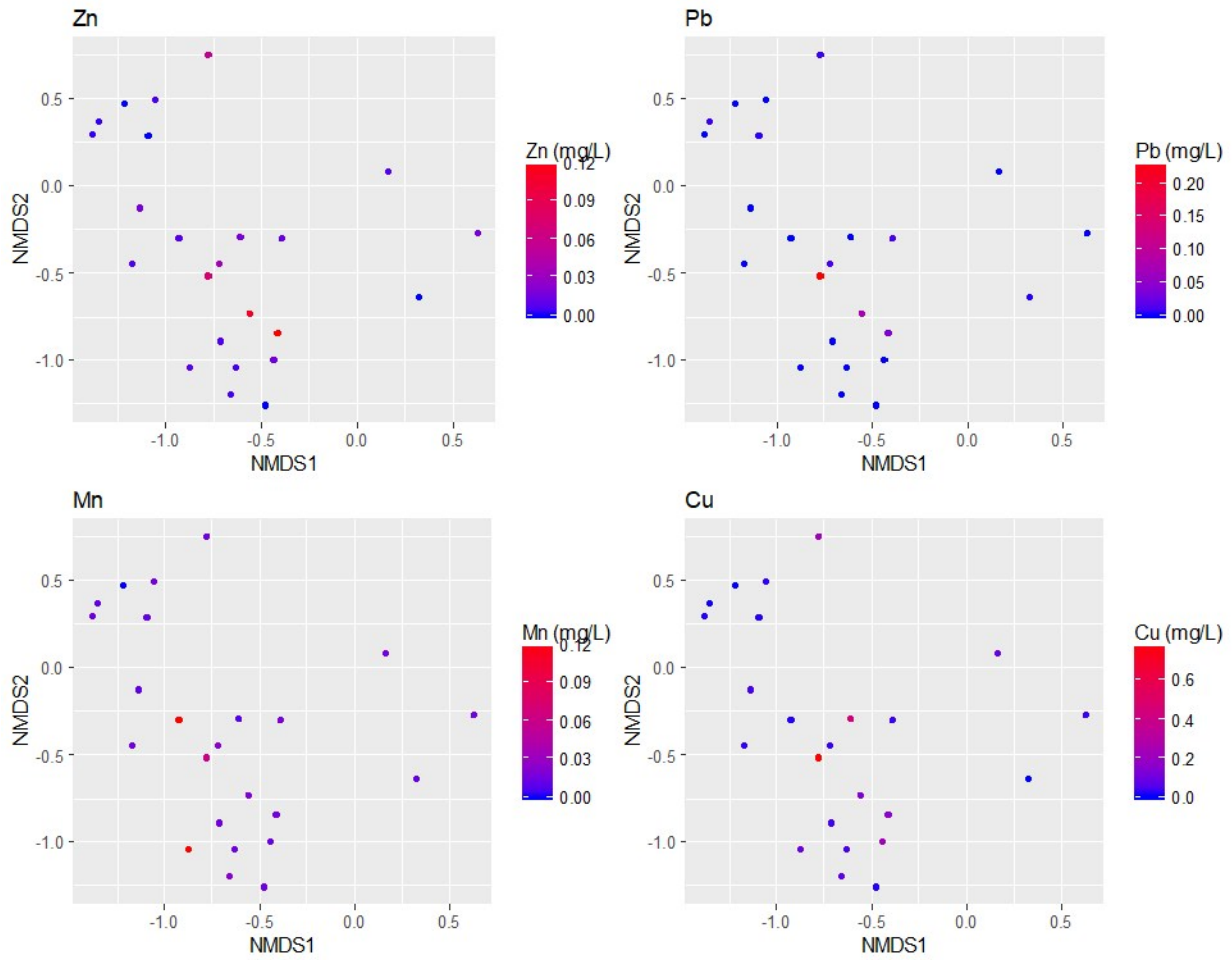

272

273

274

275

276

277

278

279

280

281

282

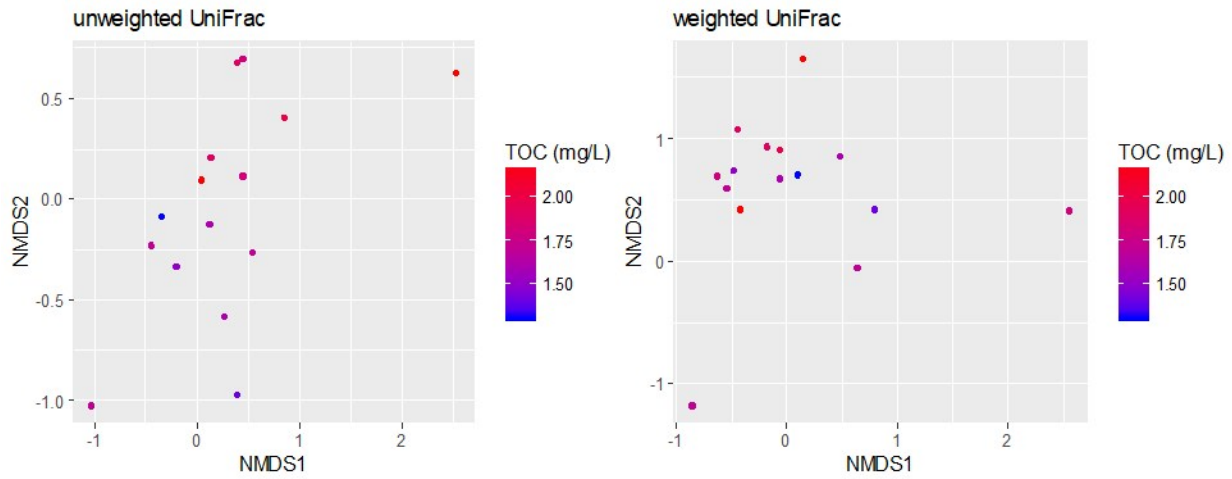

283 SI-Figure 5. Non-metric Multidimensional Scaling (NMDS) plot based on unweighted and  
284 weighted UniFrac distances showing hot water return line bacterial community in relation with  
285 total organic carbon  
286

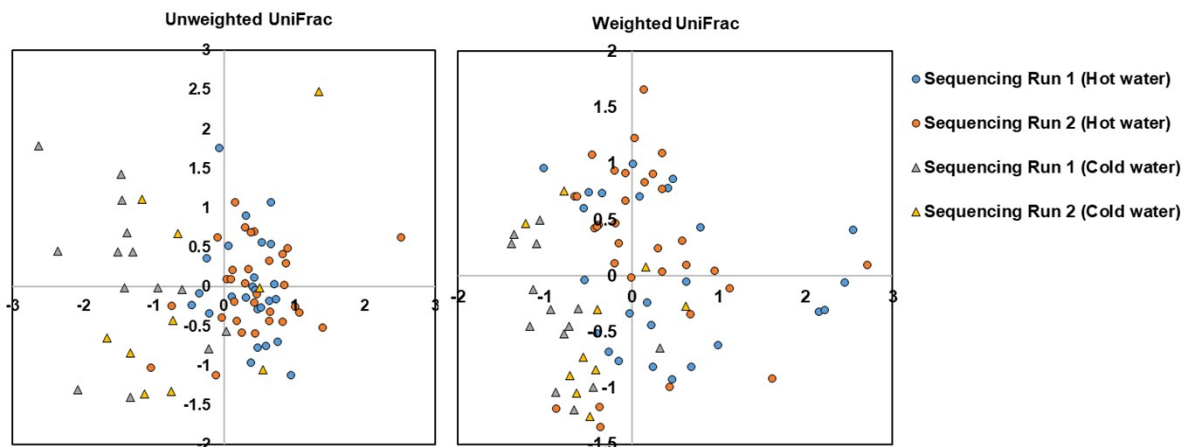

287

288 SI-Figure 6. Non-metric Multidimensional Scaling (NMDS) plot based on unweighted and  
289 weighted UniFrac distances highlighting samples from two sequencing runs  
290
